# Supplementary material for: Analysing river network dynamics and active length - discharge relationship using water presence sensors
Source: Copernicus journal article supplement (doi:10.5194/hess-2021-103), 2021-03-29
Supplement: Supplementary file [file hess-2021-103-AC1-supplement.pdf]

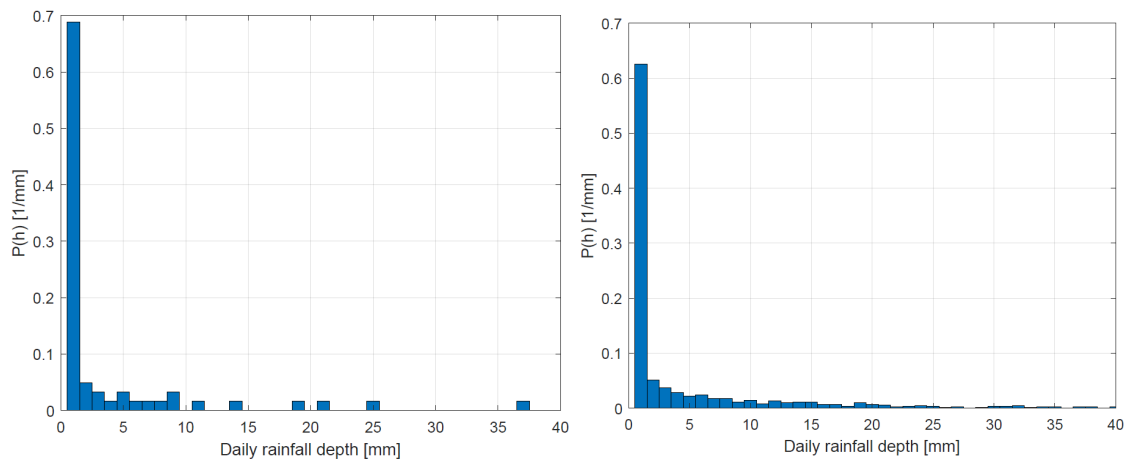

(a) September - October 2019

(b) July - November from 2010 to 2020

Figure 1: Frequency analysis of daily rainfall depth for the study period in 2019 (a) and for the years between 2010 and 2020 (b).
