# Supplementary material for: Analysing river network dynamics and active length - discharge relationship using water presence sensors
Source: Copernicus journal article supplement (doi:10.5194/hess-2021-103), 2021-03-29
Supplement: Supplementary file [file hess-2021-103-AC2-supplement.pdf]

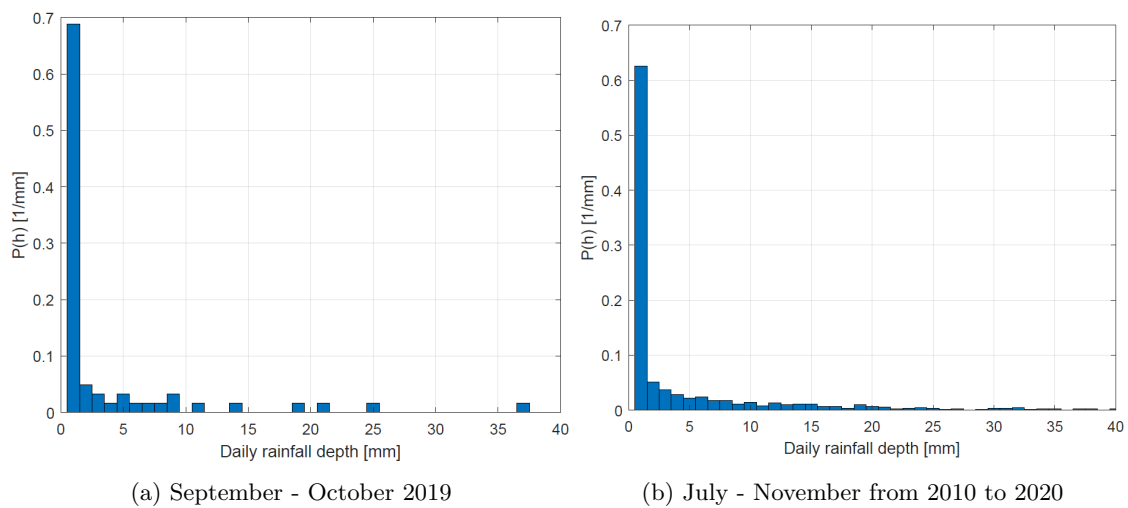

Figure 1: Frequency analysis of daily rainfall depth for the study period in 2019 (a) and for the years between 2010 and 2020 (b).

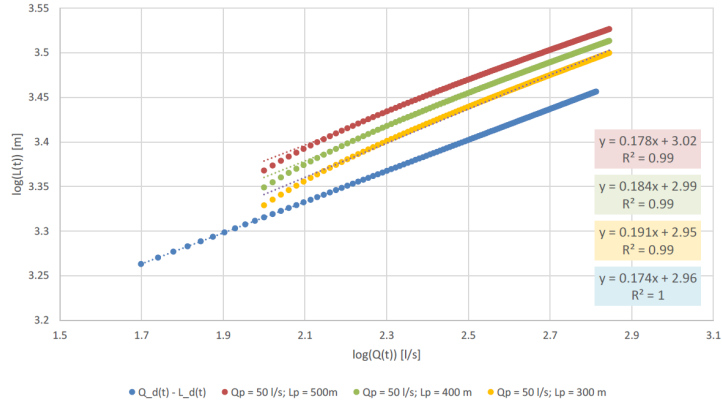

Figure 2: Relationship between the dynamical discharge ( $Q_d$ ) and network length( $L_d$ ) following the power law model with an initial  $b$  equal to 0.174 and different values of permanent discharge  $Q_p$  and length  $L_p$ .

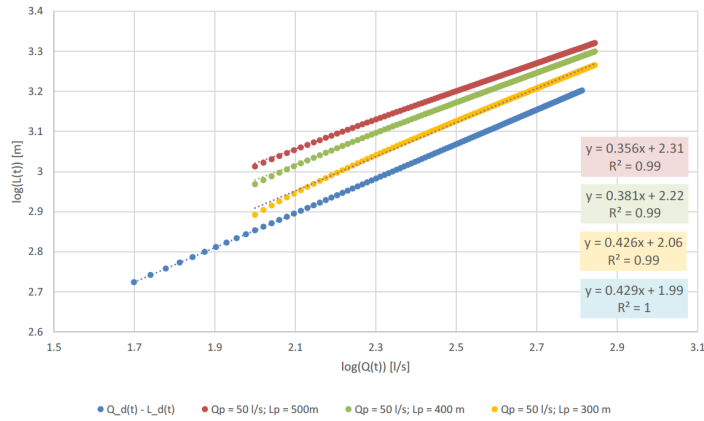

Figure 3: Relationship between the dynamical discharge ( $Q_d$ ) and network length( $L_d$ ) following the power law model with an initial  $b$  equal to 0.429 and different values of permanent discharge  $Q_p$  and length  $L_p$ .

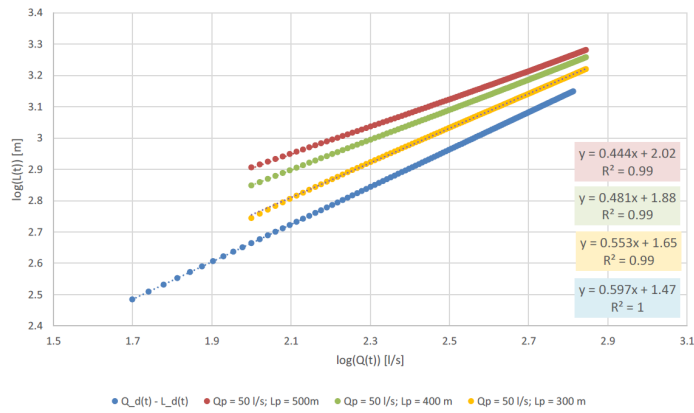

Figure 4: Relationship between the dynamical discharge ( $Q_d$ ) and network length( $L_d$ ) following the power law model with an initial  $b$  equal to 0.597 and different values of permanent discharge  $Q_p$  and length  $L_p$ .
